# Supplementary material for: Off-Resonance Gold Nanobone Films at Liquid Interface for SERS Applications
Source: MDPI journal article supplement (doi:10.3390/s22010236), 2021-12-29
Supplement: s1 [file s1]

# Off-Resonance Gold Nanobone Films at Liquid Interface for SERS Applications

Rebeca Moldovan <sup>1</sup>, Valentin Toma <sup>2</sup>, Bogdan-Cezar Iacob <sup>1</sup>, Rareș Ionuț Știufiuc <sup>2,3</sup> and Ede Bodoki <sup>1,\*</sup>

<sup>1</sup> Analytical Chemistry Department, Faculty of Pharmacy, Iuliu Hațieganu University of Medicine and Pharmacy, 400349 Cluj-Napoca, Romania; rebeca.magda@umfcluj.ro (R.M.); iacob.cezar@umfcluj.ro (B.-C.I.)

<sup>2</sup> MedFuture Research Center for Advanced Medicine, “Iuliu Hațieganu” University of Medicine and Pharmacy, 400349 Cluj-Napoca, Romania; valentin.toma@umfcluj.ro (V.T.); rares.stiufiuc@umfcluj.ro (R.I.Ș.)

<sup>3</sup> Pharmaceutical-Biophysics Department, Faculty of Pharmacy, Iuliu Hațieganu University of Medicine and Pharmacy, 400349 Cluj-Napoca, Romania

\* Correspondence: bodokie@umfcluj.ro

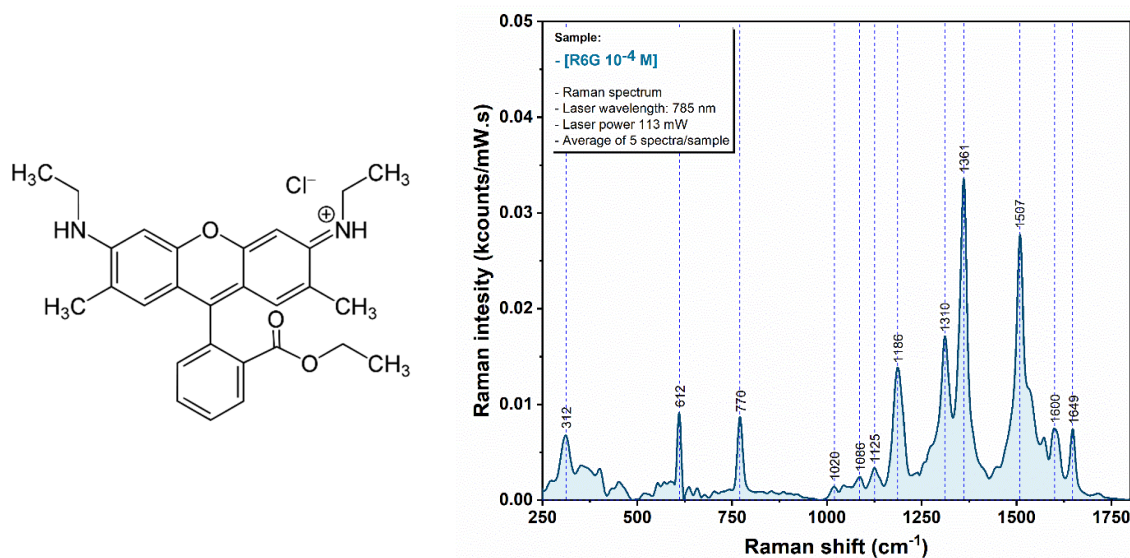

**Figure S1.** Chemical structure (left) and corresponding Raman spectrum of R6G (right).

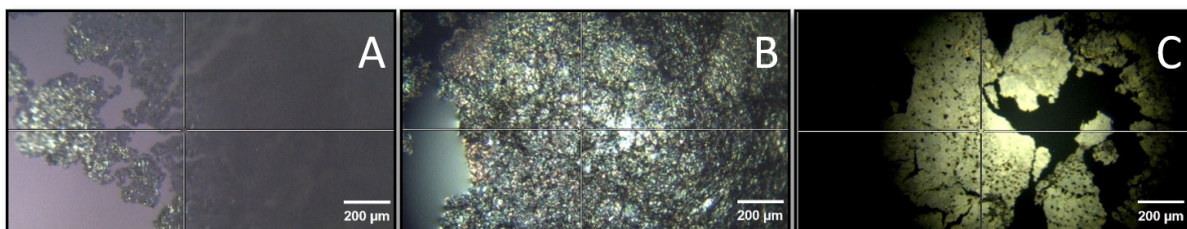

**Figure S2.** Images of the close-packed films formed via self-assembly at the CYH/Water interface seen through optical microscope.

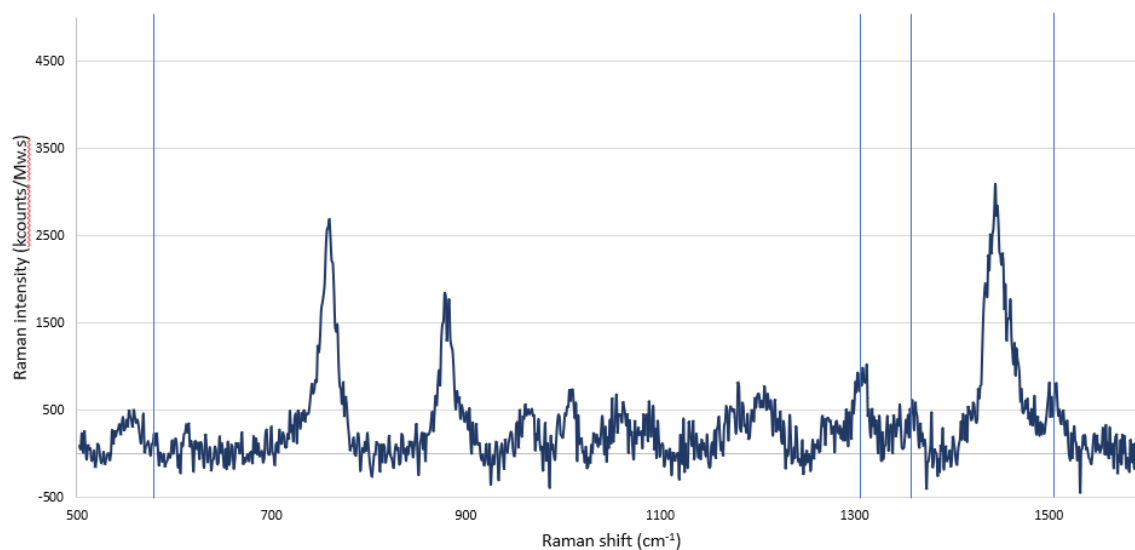

**Figure S3.** SERS spectra of 5 nM R6G on off-resonance GNBs film assembled at liquid-liquid interface. Characteristic vibrational bands can still be distinguished at 612  $\text{cm}^{-1}$  (C–C–C ring in-plane vibration), 1311  $\text{cm}^{-1}$  (N–H in-plane bending), 1362  $\text{cm}^{-1}$  and 1507  $\text{cm}^{-1}$  (C–C stretching).

Table SI. Enhancement ratio for samples A, B and C in dispersion (“d”) and as aggregated films at the liquid-air interfacial region (“i”).

| Raman Intensity Ratio | Raman Shift<br>612 $\text{cm}^{-1}$ |
|-----------------------|-------------------------------------|
| Ad/Bd                 | 2.13                                |
| Ad/Cd                 | 6.19                                |
| Bd/Cd                 | 2.89                                |
| Ai/Bi                 | 2.03                                |
| Ai/Ci                 | 1.88                                |
| Bi/Ci                 | 0.92                                |
| Ai/Ad                 | 16.79                               |
| Bi/Bd                 | 17.65                               |
| Ci/Cd                 | 55.31                               |
